# Supplementary material for: A multifunctional protein pre-coated metal–organic framework for targeted delivery with deep tissue penetration
Source: Royal Society of Chemistry journal article supplement (doi:10.1039/d4nr02345e), 2024-01-01
Supplement: d4nr02345e1.pdf [file d4nr02345e1.pdf]

## **Supplementary Information**

for

A multifunctional protein pre-coated metal-organic  
framework for targeted delivery with deep tissue penetration

*Oh et al.*

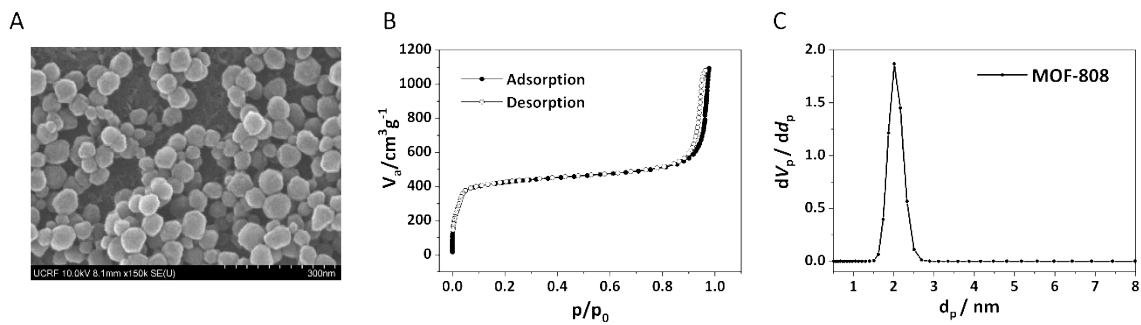

Fig. S1. Characterization of pure MOF-808 particles. (A) Scanning electron microscope (SEM) image of MOF-808 particles. (B)  $\text{N}_2$  adsorption and desorption isotherms. (C) Pore size distribution obtained by using the  $\text{N}_2$  adsorption isotherm.

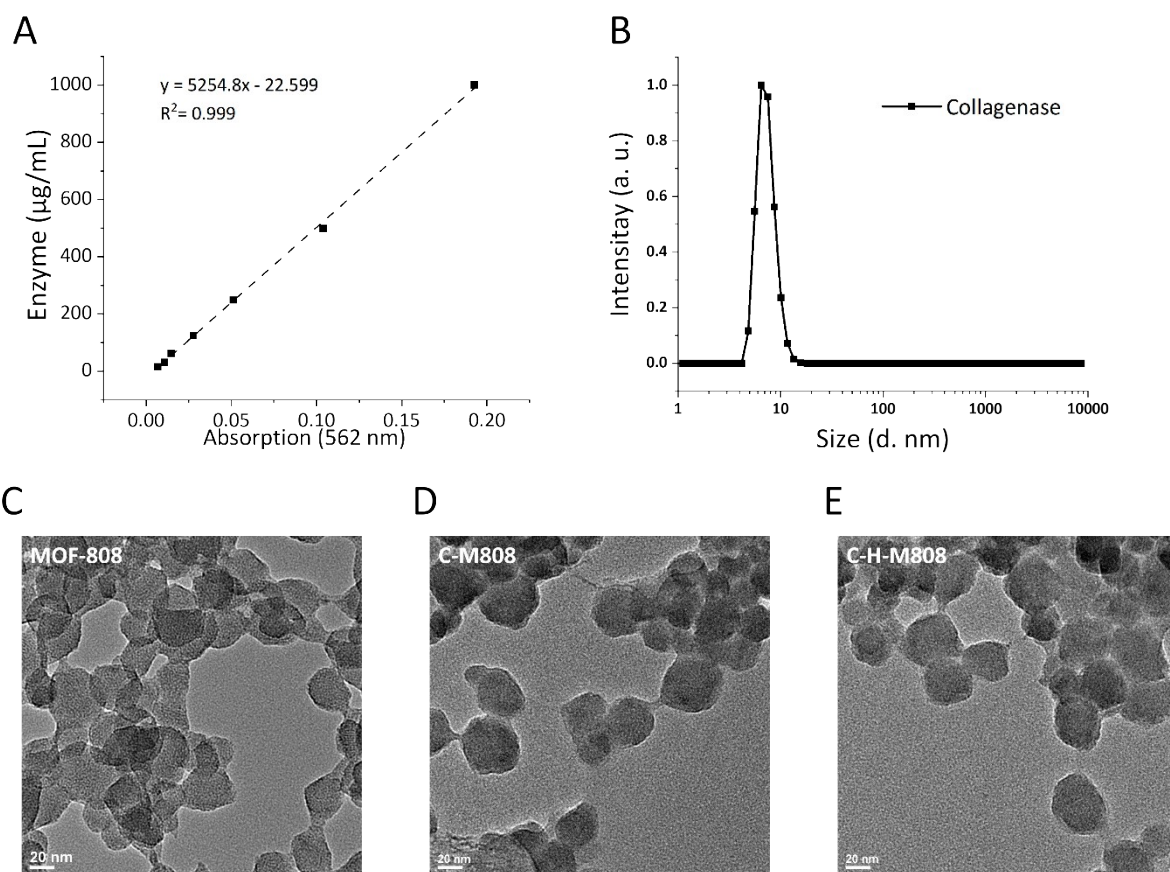

Fig. S2. (A) Collagenase standard curve for measuring collagenase attachment on Col-M808. (B) Dynamic light scattering analysis of collagenase (~6 nm). High magnification TEM images of (C) MOF-808, (D) Col-M808, and (E) Col-H-M808 particles

**A**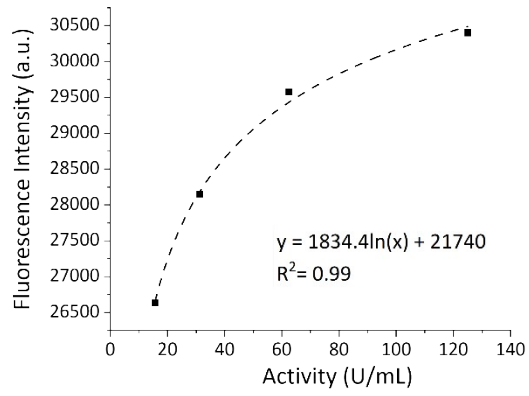**B**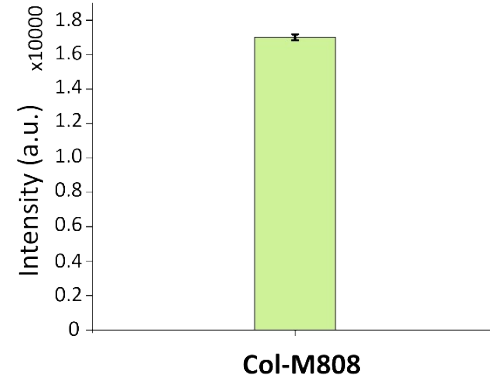

Fig. S3. (A) Collagen degradation assay: Measurement of collagenase activity of Col-M-808 using the standard curve (B) Enzymatic activity of Col-M808

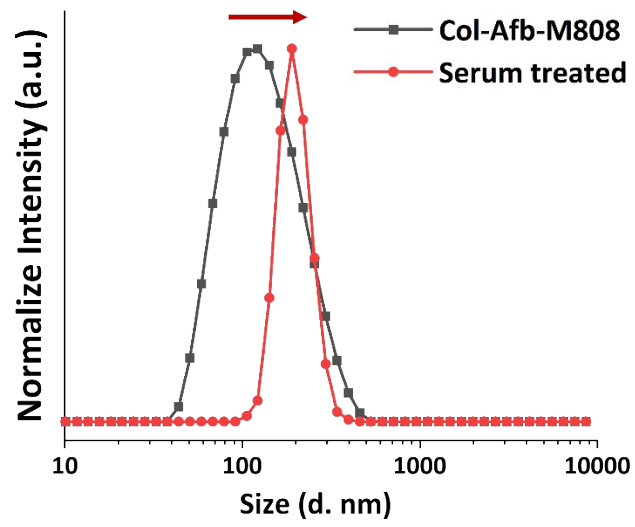

**Fig. S4.** Size distribution of Col-Afb-M808 before (Black), and after (red) treated to 10% serum solution for 1-hour incubation.

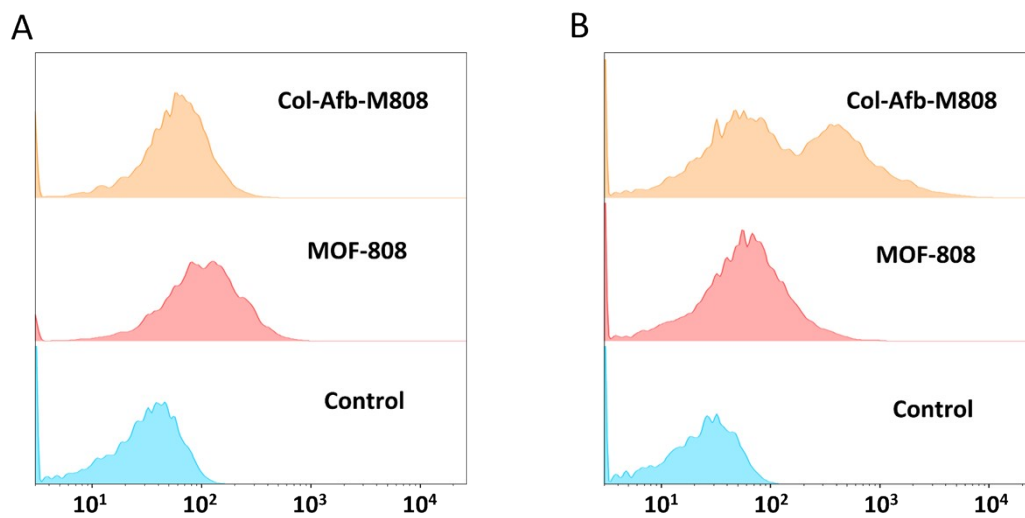

**Fig. S5.** Flow cytometry analysis of (A) RAW 264.7 cell and (B) 4T1 cells after treated with FITC loaded Col-Afb-M808 and MOF-808 for 6 hours.

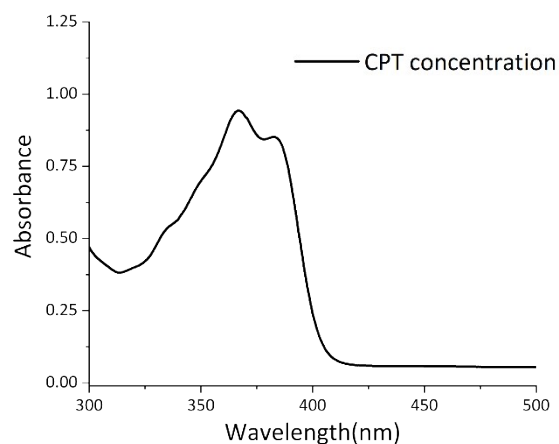

**Fig. S6.** The UV-VIS absorption spectrum of the supernatant of CPT solutions was analyzed. To do this, 5.0 mg of MOF-808 was dispersed in a drug solution containing 5 mg of drug molecules (CPT) in 1 mL DMSO. This mixture was stirred at room temperature for 24 hours. After stirring, the drug-loaded MOF-808 was centrifuged, and the supernatant was collected. The collected supernatant sample was used for measuring drug loading through UV-VIS absorption spectrum analysis, utilizing a molar absorption coefficient of  $42,282 \text{ (M}\cdot\text{cm)}^{-1}$  at  $\lambda_{\text{max}} = 365 \text{ nm}$  (CPT). The drug loading calculation was done using the following equation:

$$\text{Drug loading capacity (\%)} = (\text{Mass of drug in particle} / \text{Mass of particle}) \times 100$$

$$\text{Entrapment efficiency (\%)} = (\text{Mass of loaded drug} / \text{Initial mass of drug}) \times 100$$

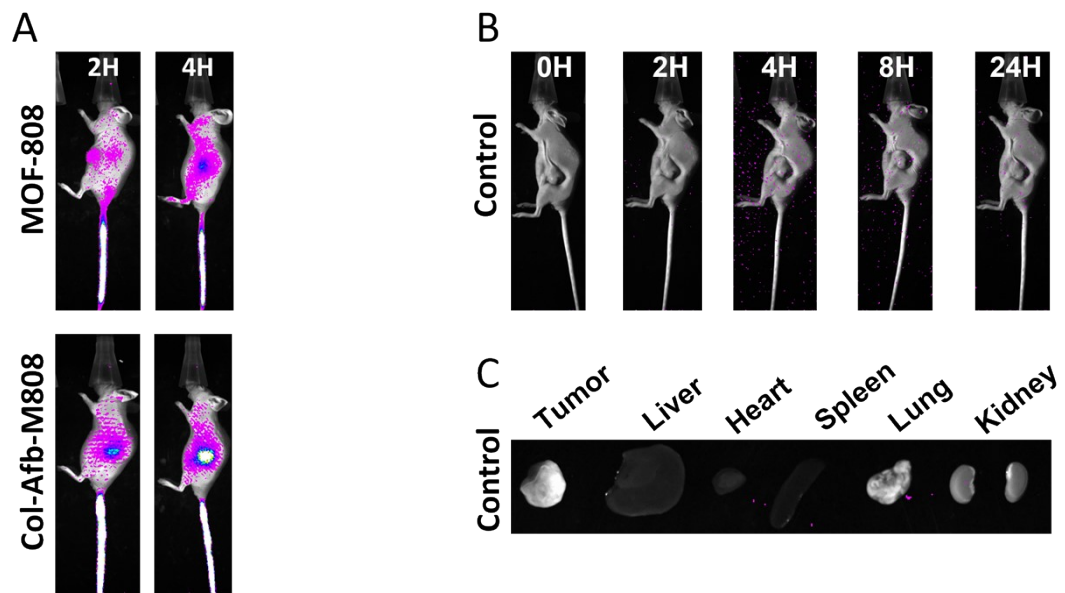

**Fig. S7.** Fluorescence emission from the 4T1-bearing mice (side) that were intravenously injected with IR-780 loaded (A) MOF-808, Col-Afb-M808 and (B-C) Control buffer solution (PBS 7.4).



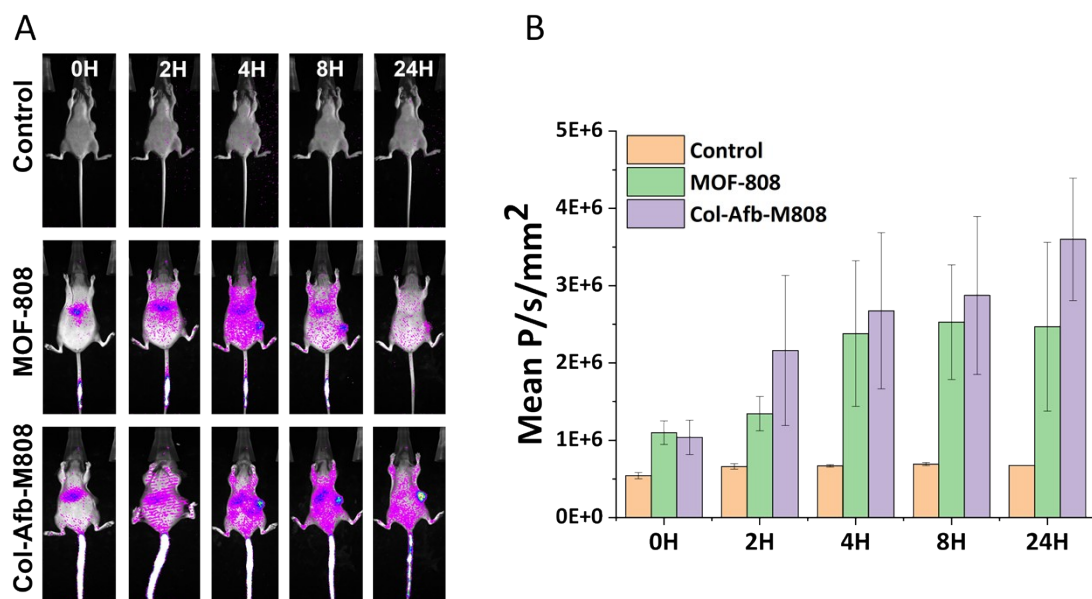

**Fig. S8.** Fluorescence emission from the 4T1-bearing mice (front) that were intravenously injected with IR-780 loaded (A) MOF-808, Col-Afb-M808 and Control buffer solution (PBS 7.4). (B) Intensity of Fig. S8A

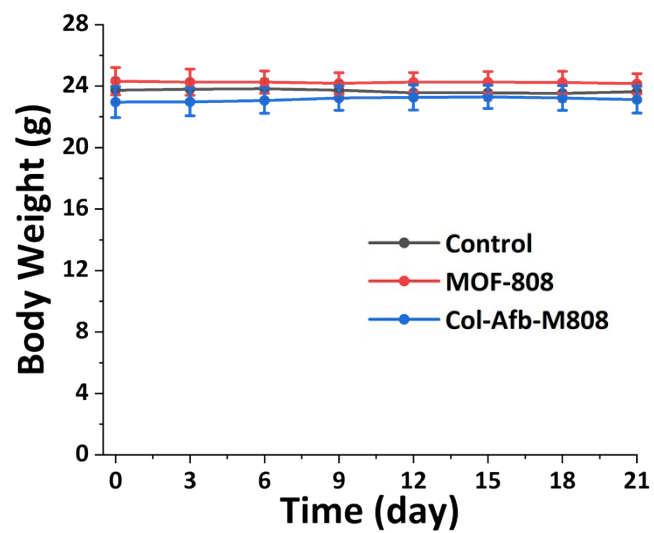

**Fig. S9.** Body weight (g) of the mice in each group treated.

**Estimation of the Number of the proteins (GST-Afb, Collagenase) and ratio attached to one each MOF-808 Particle.** This value was approximately calculated by using the TEM-observed average size of MOF-808 (~ 50 nm; n = 80) and by assuming the 0.2 ~ 0.4 cm<sup>3</sup>/g density of bulk MOF-808.

i) Number of GST-Afb proteins per 1 mg of the MOF-808 = 0.163 mg/ [M.W. of GST-Afb (3.6 × 10<sup>7</sup>) mg/mol] × (6.02 × 10<sup>23</sup>)/mol = 2.71 × 10<sup>16</sup>

ii) Number of particles in 1 mg = 1 mg/ [0.2 g/cm<sup>3</sup> × ( $\frac{4}{3}\pi \cdot 25 \text{ nm}^3$ )] = 3.81 × 10<sup>14</sup>

**Thus, the number GST-Afb proteins per particle = i)/ ii) = ~ 71**

i) Number of GST-Afb proteins per 1 mg of the MOF-808 = 0.148 mg/ [M.W. of GST-Afb (7.2 × 10<sup>7</sup>) mg/mol] × (6.02 × 10<sup>23</sup>)/mol = 1.24 × 10<sup>16</sup>

ii) Number of particles in 1 mg = 1 mg/ [0.2 g/cm<sup>3</sup> × ( $\frac{4}{3}\pi \cdot 25 \text{ nm}^3$ )] = 3.81 × 10<sup>14</sup>

**Thus, the number Collagenase proteins per particle = i)/ ii) = ~ 32**

i) Number of mixed proteins (GST-Afb and Collagenase) per 1 mg of the MOF-808 = 0.155 mg/ [M.W. of mean of proteins (5.4 × 10<sup>7</sup>) mg/mol] × (6.02 × 10<sup>23</sup>)/mol = 1.67 × 10<sup>16</sup>

ii) Number of particles in 1 mg = 1 mg/ [0.2 g/cm<sup>3</sup> × ( $\frac{4}{3}\pi \cdot 25 \text{ nm}^3$ )] = 3.81 × 10<sup>14</sup>

**Thus, the total number proteins per particle = i)/ ii) = ~ 44, and MW ratio of GST-Afb:Collagenase = ~1:2**
